# Supplementary material
Source: HighWire-hosted journal article supplement (https://erj.ersjournals.com/content/56/2/2002105)
Supplement: inline-supplementary-material-1 [file inline-supplementary-material-1.pdf]

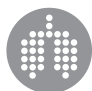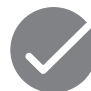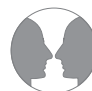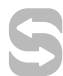

SHAREABLE PDF

# The (in)significance of TB and COVID-19 co-infection

Alkesh Kumar Khurana<sup>1</sup> and Deepak Aggarwal<sup>2</sup>

**Affiliations:** <sup>1</sup>Pulmonary Medicine, All India Institute of Medical Sciences, Bhopal, India. <sup>2</sup>Pulmonary Medicine, Govt Medical College and Hospital, Chandigarh, India.

**Correspondence:** Alkesh Kumar Khurana, Pulmonary Medicine, All India Institute of Medical Sciences, Bhopal, Madhya Pradesh, India. E-mail: lungcancer@rediffmail.com

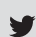

@ERSpublications

**In the fight against COVID-19 pandemic, we should not forget to suspect and manage TB appropriately, as it is still one of the leading infectious causes of death worldwide** <https://bit.ly/30FZs9C>

**Cite this article as:** Khurana AK, Aggarwal D. The (in)significance of TB and COVID-19 co-infection. *Eur Respir J* 2020; 56: 2002105 [<https://doi.org/10.1183/13993003.02105-2020>].

This single-page version can be shared freely online.

*To the Editor:*

We read with great interest the research letter by TADOLINI *et al.* [1], in which they have published the first cohort of 49 cases of tuberculosis (TB) and coronavirus disease 2019 (COVID-19) co-infection. However, a few issues regarding the letter need to be addressed.
